# Supplementary material
Source: PubMed Central journal article supplement (PMC4684958)
Supplement: NIHMS733576-supplement-1.pdf [file NIHMS733576-supplement-1.pdf]

## Supplemental Figure 1

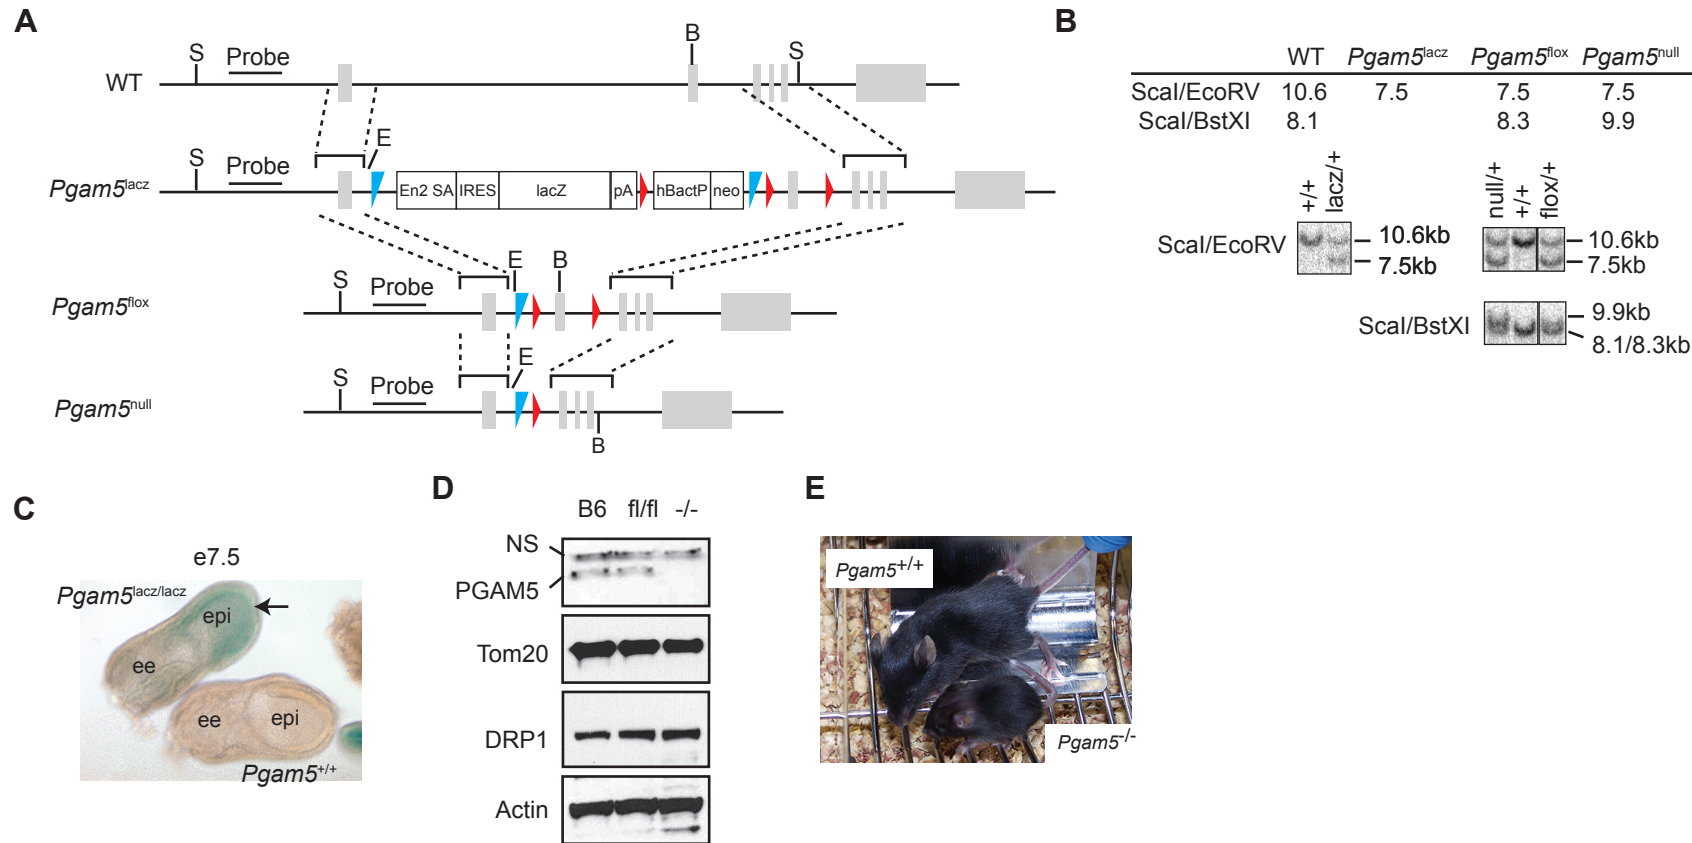

### Supplemental figure 1. Generation of *Pgam5<sup>-/-</sup>* mice.

(A) *Pgam5* gene targeting strategy. Exons are shown as gray boxes. En2SA, engrailed 2 splice acceptor. IRES, internal ribosome entry site. lacZ, β-galactosidase. pA, polyadenylation sequences. hBactP, human β-actin promoter. Neo, neomycin resistance gene. Loxp and FRT sequences are indicated, as red and blue triangles, respectively. Restriction enzyme sites: S, Scal; E, EcoRI; B, BstXI. Solid black lines represent Southern blot probe used for genotyping.

(B) Genomic DNA from mice of the indicated genotypes was digested by restriction enzymes and subsequently subjected to Southern blotting analysis using 5' probe shown in A. The predicted sizes of the bands in kb are shown in the table above.

(C) β-galactosidase staining of E7.5 embryos from *Pgam5<sup>lacZ/lacZ</sup>* mice. The arrow indicates positive staining in the epiblast (epi). ee: extra-embryonic maternal tissues. A wild type embryo (below) was shown for comparison.

(D) Western blot of whole cell lysates from C57BL/6, *Pgam5<sup>fl/fl</sup>* and *Pgam5<sup>-/-</sup>* BMDMs. NS: non-specific signal.

(E) Picture of 3 weeks old wild type and *Pgam5<sup>-/-</sup>* littermates shows that *Pgam5<sup>-/-</sup>* mice were smaller in size.

**Figure S2**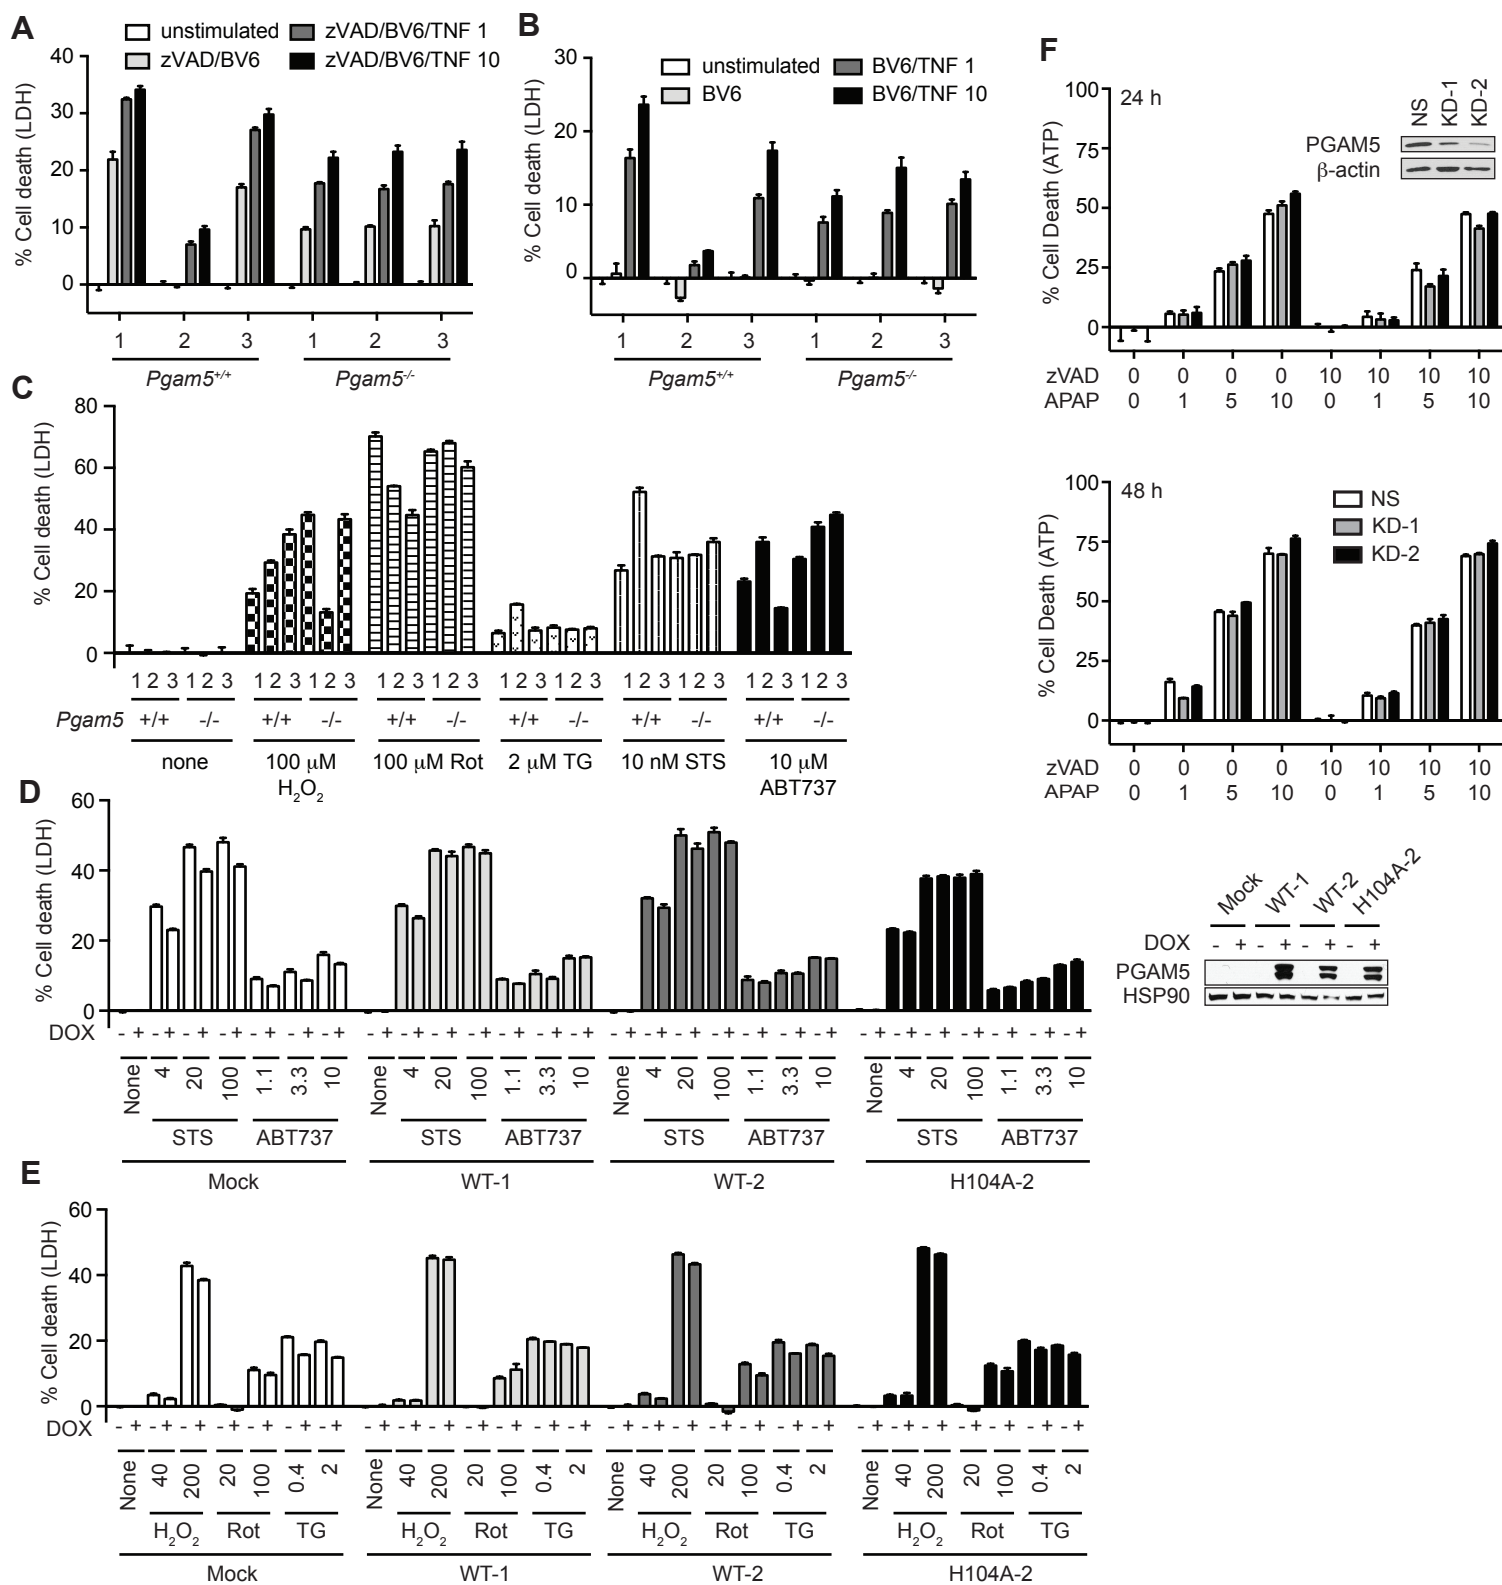**Figure S2. PGAM5 is dispensable for apoptosis and necroptosis induced by multiple stimuli.**

(A-C) Three different primary MEF lines from *Pgam5*<sup>+/+</sup> and *Pgam5*<sup>-/-</sup> mice were treated for 24 hours as indicated. TNF was used at 1 or 10 ng/ml as indicated. Rot: Rottlerin, TG: thapsigargin, STS: staurosporine.

(D, E) SV40-immortalized *Pgam5*<sup>-/-</sup> MEFs reconstituted with PGAM5 wild type isoform 1 (WT-1), isoform-2 (WT-2) or phosphatase-dead isoform 2 (H104A-2) were treated with H<sub>2</sub>O<sub>2</sub> (μM), Rot (μM), TG (μM), STS (nM), or ABT737 (μM) for 24 hours. PGAM5 expression was induced by 1 μg/ml doxycycline (DOX) for 24 hours before stimulation with the indicated agents. PGAM5 expression by Western blot after induction with 1 μg/ml doxycycline (DOX) for 24 hours was shown on the right.

(F) HepG2 cells transduced with *Pgam5* shRNA (KD) were treated by acetaminophen (APAP, mM) with/without zVAD-fmk (zVAD, μM). NS, non-specific shRNA. Knockdown of PGAM5 expression was confirmed by western blotting.

**Figure S3**

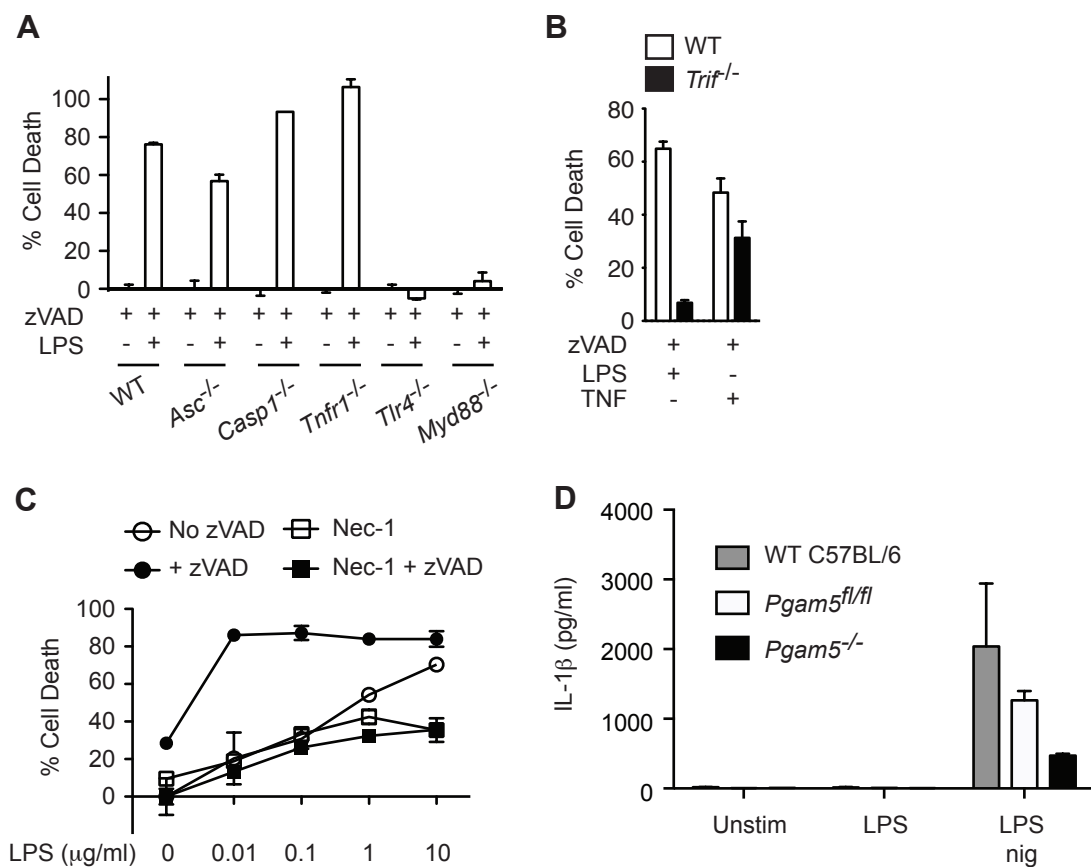

**Fig. S3. LPS-induced necroptosis in macrophages requires TRIF, MyD88, and RIPK1 kinase activity.** (A-B) J2-transformed macrophages of the indicated genotypes or (C) wild type (WT) J2 macrophages were pretreated with z-VAD-fmk (zVAD) and/or Nec-1 for 1 hour, followed by stimulation with LPS. Cell death was measured 6 hours later. (D) IL-1 $\beta$  secretion by LPS+nigericin treated BMDMs from mice of the indicated genotypes showed that PGAM5 is required for optimal IL-1 $\beta$  secretion.
